# Supplementary material for: WhoseEgg: classification software for invasive carp eggs
Source: PeerJ. 2023 Feb 27;11:e14787. doi: 10.7717/peerj.14787 (PMC9979831; doi:10.7717/peerj.14787)
Supplement: Supplemental Information 1 — The spreadsheet contains “helpers” to assist users correctly format the data. [file peerj-11-14787-s001.xlsx]

## Sheet: template
Egg_ID	Year	Month	Day	Temperature	Conductivity	Deflated	Pigment	Egg_Stage	Compact_Diffuse	Sticky_Debris	Membrane_Ave	Membrane_SD	Embryo_Ave	Embryo_SD	Larval_Length
